# Supplementary material
Source: PubMed Central journal article supplement (PMC6855125)

**Supplementary Table 1. The estimated annual drug costs of CML treatment by other investigators.**

| Reference                   | Strategy    | Annual cost (USD) |
|-----------------------------|-------------|-------------------|
| Shih et al. <sup>23*</sup>  | Imatinib    | 35,000            |
|                             | Second-TKIs | 152,814           |
| Padula et al. <sup>8†</sup> | Imatinib    | 45,875            |
|                             | Dasatinib   | 92,117            |
|                             | Nilotinib   | 87,445            |

\*The cost of TKIs were extracted from 2018 wholesale acquisition cost in the RED BOOK. The cost of imatinib was the calculated from average of the cost of nine generic compounds available in the US. The cost of branded nilotinib was used as the cost of second-TKIs.

†The costs were extracted from 2011-2012 MarketScan data.

**Supplementary Table 2. The analysis using the costs estimated by other investigators.**

| Strategy                                                        | Cost (USD) | QALY | ICER      | Cost saved by 'stop TKI' |
|-----------------------------------------------------------------|------------|------|-----------|--------------------------|
| Analysis based on the costs by Shih <i>et al.</i> <sup>23</sup> |            |      |           |                          |
| Without 'stop TKI'                                              |            |      |           |                          |
| Imatinib first                                                  | 501,757    | 7.26 |           |                          |
| Physician's choice                                              | 1,020,186  | 7.44 | 2,846,324 |                          |
| Nilotinib first                                                 | 1,271,436  | 7.50 | 3,216,872 |                          |
| Dasatinib first                                                 | 1,287,834  | 7.57 | 2,559,212 |                          |
| With 'stop TKI' at MR4.5 for 2 years                            |            |      |           |                          |
| Imatinib first                                                  | 475,441    | 7.34 |           | 26,316                   |
| Physician's choice                                              | 880,125    | 7.55 | 1,851,980 | 140,060                  |
| Nilotinib first                                                 | 1,054,559  | 7.64 | 1,886,275 | 216,877                  |
| Dasatinib first                                                 | 1,110,790  | 7.68 | 1,822,959 | 177,043                  |
| With 'stop TKI' at MR4.0 for 2 years                            |            |      |           |                          |
| Imatinib first                                                  | 468,684    | 7.36 |           | 33,073                   |
| Physician's choice                                              | 835,842    | 7.60 | 1,560,287 | 184,344                  |
| Nilotinib first                                                 | 996,909    | 7.69 | 1,611,465 | 274,527                  |
| Dasatinib first                                                 | 1,042,477  | 7.74 | 1,517,367 | 245,357                  |
| Analysis based on the cost by Padula <i>et al.</i> <sup>8</sup> |            |      |           |                          |
| Without 'stop TKI'                                              |            |      |           |                          |
| Imatinib first                                                  | 458,407    | 7.26 |           |                          |
| Physician's choice                                              | 656,980    | 7.44 | 1,090,222 |                          |
| Nilotinib first                                                 | 737,060    | 7.50 | 1,164,631 |                          |
| Dasatinib first                                                 | 775,472    | 7.57 | 1,032,260 |                          |
| With 'stop TKI' at MR4.5 for 2 years                            |            |      |           |                          |
| Imatinib first                                                  | 442,103    | 7.34 |           | 16,304                   |
| Physician's choice                                              | 595,098    | 7.55 | 700,158   | 61,882                   |
| Nilotinib first                                                 | 646,741    | 7.64 | 666,535   | 90,319                   |
| Dasatinib first                                                 | 696,449    | 7.68 | 729,776   | 79,022                   |
| With 'stop TKI' at MR4.0 for 2 years                            |            |      |           |                          |
| Imatinib first                                                  | 437,849    | 7.36 |           | 20,558                   |
| Physician's choice                                              | 575,520    | 7.60 | 585,055   | 81,460                   |
| Nilotinib first                                                 | 622,740    | 7.69 | 564,051   | 114,320                  |
| Dasatinib first                                                 | 665,972    | 7.74 | 603,262   | 109,500                  |

**Supplementary figure 1. The two-way sensitivity analysis of the US model with 20-year simulation allowing 'stop TKI' at one-year of MR4.0.**

The colored area indicates the range in which the strategy dominates others. Lines indicate the base-case values. (A) The probabilities of successful 'stop TKI' with dasatinib and nilotinib are varied. The probability of 'stop TKI' with imatinib is fixed at 0.38. (B) the probabilities of achieving CCyR at 12 months dasatinib and nilotinib are varied. The probability of CCyR at 12 months with imatinib is fixed at 0.70.

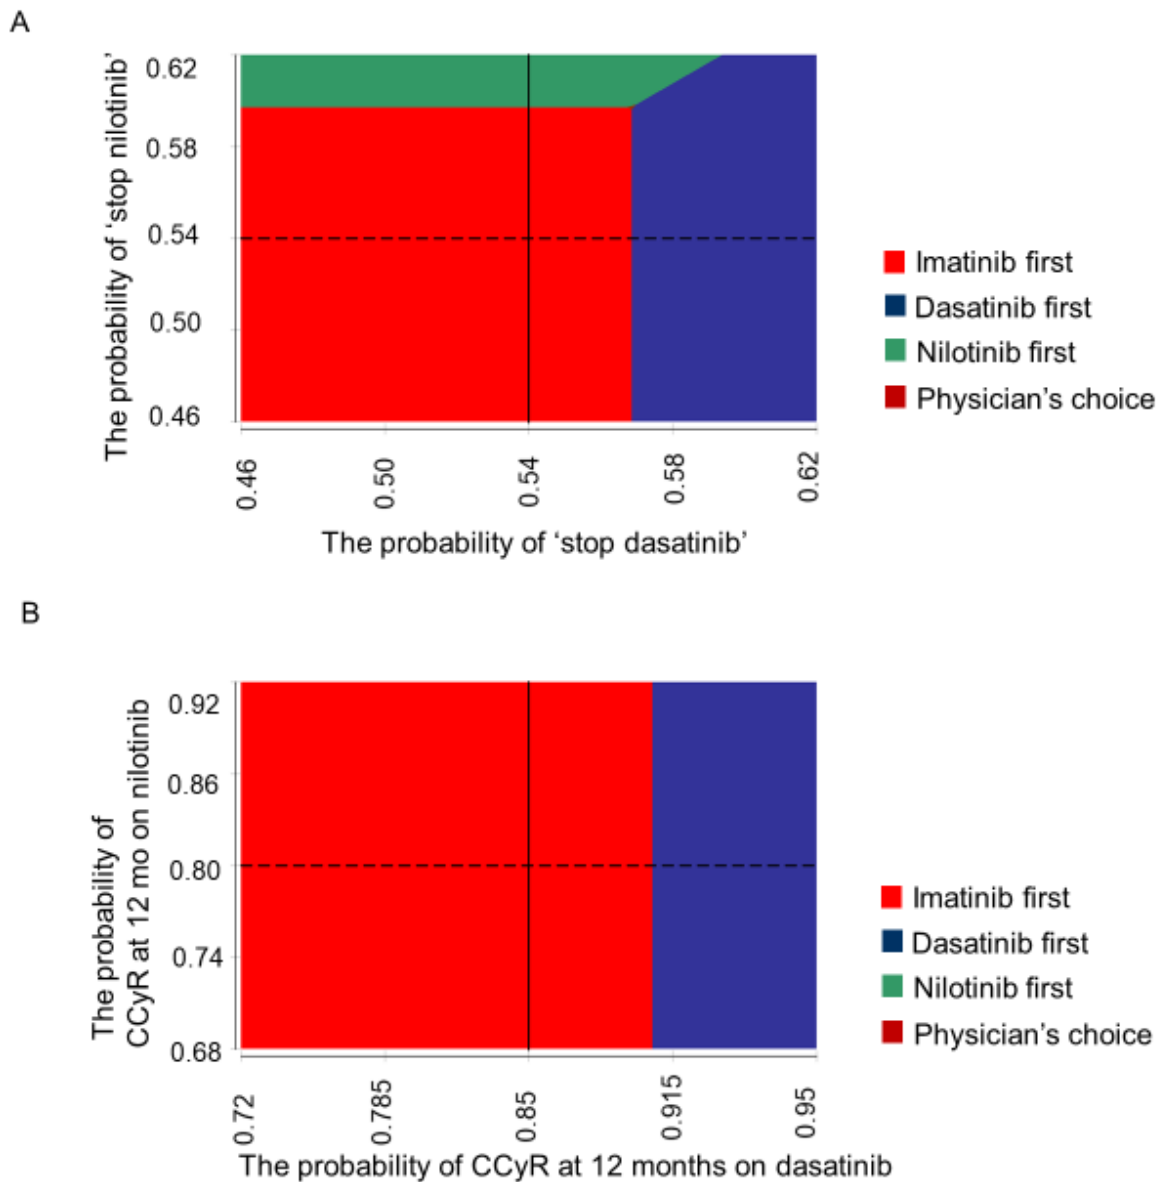

Supplement: baADV2019000745-suppl1.pdf [file baADV2019000745-suppl1.pdf]
